# Supplementary material for: Structure and properties of type-II clathrate Cs8Na16−xTlxGe136
Source: Royal Society of Chemistry journal article supplement (doi:10.1039/c5dt02766g), 2015-01-01
Supplement: c5dt02766g1.pdf [file c5dt02766g1.pdf]

### General

**Origin** Cs<sub>8</sub>Na<sub>10</sub>Tl<sub>6</sub>Ge<sub>136</sub>

### Bibliographic data

### Phase data

**Space-group** C 1 2/m 1 (12) - monoclinic

**Cell** a=21.9114 Å b=21.9114 Å c=26.8359 Å β=144.74°

V=7438.68 Å<sup>3</sup>

### Atomic parameters

| Atom | Ox. | Wyck. | Site | S.O.F. | x/a     | y/b      | z/c     | U [Å <sup>2</sup> ] |
|------|-----|-------|------|--------|---------|----------|---------|---------------------|
| Cs1  |     | 8j    | 1    |        | 0.25000 | 0.25000  | 0.87500 | 0.0343              |
| Na2  |     | 8j    | 1    |        | 0.37500 | -0.12500 | 0.75000 | 0.0155              |
| Tl3  |     | 8j    | 1    |        | 0.12500 | 0.12500  | 0.25000 | 0.0155              |
| Ge4  |     | 8j    | 1    |        | 0.25000 | -0.25000 | 0.37500 | 0.0082              |
| Ge5  |     | 8j    | 1    |        | 0.25000 | -0.25000 | 0.28262 | 0.0089              |
| Ge6  |     | 8j    | 1    |        | 0.59238 | 0.09238  | 0.96738 | 0.0089              |
| Ge7  |     | 8j    | 1    |        | 0.34238 | 0.34238  | 0.46738 | 0.0089              |
| Ge8  |     | 8j    | 1    |        | 0.56524 | 0.25000  | 0.28262 | 0.0089              |
| Ge9  |     | 8j    | 1    |        | 0.34238 | 0.15762  | 0.46738 | 0.0089              |
| Ge10 |     | 8j    | 1    |        | 0.40762 | 0.40762  | 0.03262 | 0.0089              |
| Ge11 |     | 8j    | 1    |        | 0.09399 | 0.09399  | 0.81768 | 0.0096              |
| Ge12 |     | 8j    | 1    |        | 0.34399 | -0.15601 | 0.31768 | 0.0096              |
| Ge13 |     | 8j    | 1    |        | 0.59399 | 0.09399  | 0.81768 | 0.0096              |
| Ge14 |     | 8j    | 1    |        | 0.34399 | 0.34399  | 0.31768 | 0.0096              |
| Ge15 |     | 8j    | 1    |        | 0.65131 | 0.15131  | 0.93232 | 0.0096              |
| Ge16 |     | 8j    | 1    |        | 0.40131 | 0.40131  | 0.43232 | 0.0096              |
| Ge17 |     | 8j    | 1    |        | 0.54137 | 0.15601  | 0.31768 | 0.0096              |
| Ge18 |     | 8j    | 1    |        | 0.79137 | -0.09399 | 0.81768 | 0.0096              |
| Ge19 |     | 8j    | 1    |        | 0.29137 | -0.09399 | 0.81768 | 0.0096              |
| Ge20 |     | 8j    | 1    |        | 0.21333 | 0.09869  | 0.43232 | 0.0096              |
| Ge21 |     | 8j    | 1    |        | 0.71333 | 0.09869  | 0.43232 | 0.0096              |
| Ge22 |     | 8j    | 1    |        | 0.40131 | 0.09869  | 0.43232 | 0.0096              |
| Ge23 |     | 8j    | 1    |        | 0.46333 | 0.15131  | 0.93232 | 0.0096              |
| Ge24 |     | 8j    | 1    |        | 0.54137 | 0.34399  | 0.31768 | 0.0096              |
| Ge25 |     | 8j    | 1    |        | 0.56201 | 0.25000  | 0.12969 | 0.0096              |
| Ge26 |     | 8j    | 1    |        | 0.44737 | 0.25000  | 0.12969 | 0.0096              |
| Ge27 |     | 8j    | 1    |        | 0.49531 | 0.19268  | 0.62031 | 0.0096              |
| Ge28 |     | 8j    | 1    |        | 0.49531 | -0.30732 | 0.62031 | 0.0096              |

|      |    |     |         |          |         |        |
|------|----|-----|---------|----------|---------|--------|
| Ge29 | 8j | 1   | 0.74531 | 0.05732  | 0.12031 | 0.0096 |
| Ge30 | 8j | 1   | 0.34869 | 0.34869  | 0.06768 | 0.0096 |
| Ge31 | 8j | 1   | 0.53667 | -0.34869 | 0.06768 | 0.0096 |
| Ge32 | 8j | 1   | 0.75469 | -0.05732 | 0.87969 | 0.0096 |
| Cs33 | 4i | m   | 1/2     | 0        | 3/8     | 0.0343 |
| Cs34 | 4i | m   | 0       | 0        | 3/8     | 0.0343 |
| Na35 | 4i | m   | 1/4     | 0        | 0       | 0.0155 |
| Ge36 | 4i | m   | 0       | 0        | 7/8     | 0.0082 |
| Ge37 | 4i | m   | 1/2     | 0        | 7/8     | 0.0082 |
| Ge38 | 4i | m   | 0       | 0        | 0.78262 | 0.0089 |
| Ge39 | 4i | m   | 1/2     | 0        | 0.78262 | 0.0089 |
| Ge40 | 4i | m   | 0.81524 | 0        | 0.78262 | 0.0089 |
| Ge41 | 4i | m   | 0.31524 | 0        | 0.78262 | 0.0089 |
| Ge42 | 4i | m   | 0.81201 | 0        | 0.62969 | 0.0096 |
| Ge43 | 4i | m   | 0.31201 | 0        | 0.62969 | 0.0096 |
| Ge44 | 4i | m   | 0.69737 | 0        | 0.62969 | 0.0096 |
| Ge45 | 4i | m   | 0.19737 | 0        | 0.62969 | 0.0096 |
| Na46 | 2a | 2/m | 0       | 0        | 0       | 0.0155 |
| Tl47 | 4f | -1  | 1/4     | -1/4     | 1/2     | 0.0155 |
| Na48 | 2b | 2/m | 1/2     | 0        | 0       | 0.0155 |
| Na49 | 4h | 2   | 1/2     | -1/4     | 1/2     | 0.0155 |

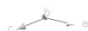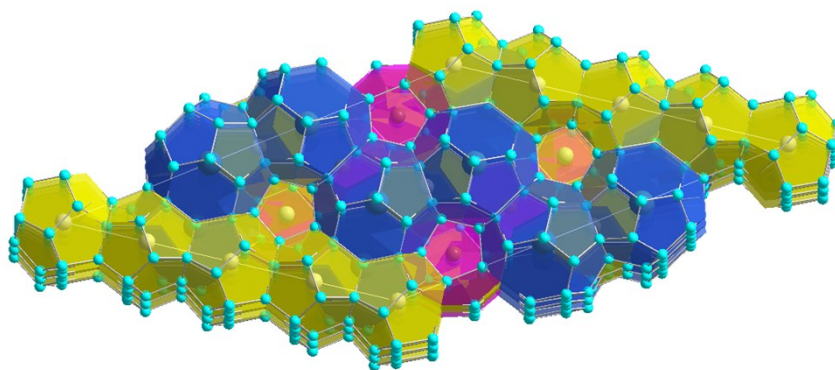

Fig. Theoretical calculation structure model of  $\text{Cs}_8\text{Na}_{10}\text{Tl}_6\text{Ge}_{136}$  in  $C2/m$  space group with  $a = b = 21.9114 \text{ \AA}$ ,  $c = 26.8359 \text{ \AA}$  and  $\beta = 144.7356^\circ$ : Na/Tl lie in the center of yellow/pink 20-vertex pentagonal dodecahedra  $[5^{12}]$  and Cs reside in the center of blue 28-vertex hexakaidecahedra  $[5^{12}6^4]$  built by Ge.
